# Supplementary material for: Latent Profile Analysis of the Five Facet Mindfulness Questionnaire (FFMQ) Subscales in a Naturalistic Sample of Patients with Past or Present Major Depression: A Replication and Extension Study
Source: Springer Nature journal article supplement (doi:10.1007/s12671-023-02298-y), 2024-01-26
Supplement: MOESM1 [file 26664398]

# Latent Profile Analysis of the Five Facet Mindfulness Questionnaire (FFMQ) Subscales in a Naturalistic Sample of Patients with Past or Present Major Depression: a Replication and Extension Study

# Supplementary Material

## Structure of the FFMQ-SF in the current sample

Confirmatory factor analyses revealed that a single-factor (mindfulness) model fitted the data poorly at both time points (Supplementary Table S1). The correlated five-factor CFA model showed adequate to good fit at baseline (RMSEA = 0.05; CFI = 0.91; TLI = .90, SRMR = 0.07) and even slightly better fit at post-treatment (RMSEA = 0.05; CFI = 0.94; TLI = 0.93, SRMR = 0.05), see Supplementary Table S1. To test whether the five factors contribute to an overall construct of mindfulness a second-order hierarchical model was tested. At baseline, this model shows adequate fit based on the RMSEA and SRMR, however CFI and TLI are slightly below 0.90 (Supplementary Table S1). At post-treatment this model shows adequate fit based on all fit criteria (Supplementary table S1). At both time points, AIC and BIC were lower for the correlated five-factor model compared to the second order hierarchical model, indicating that the correlated five-factor model fits the data best before and after MBCT. Standardized factor loadings of the correlated five-factor model are presented in Supplementary Table S2.

## Supplementary Tables

**Supplementary Table S1**

*Fit indices of single-factor, correlated five-factor and second order hierarchical CFA models of FFMQ-SF (Dutch version)*

|  | RMSEA (90CI) | CFI | TLI | SRMR | χ2 | *df* | AIC | BIC |
| --- | --- | --- | --- | --- | --- | --- | --- | --- |
| CFA at baseline | | | | |  |  |  |  |
| One-factor | 0.14 (0.13 – 0.14) | 0.39 | 0.33 | 0.13 | 3776.4 | 252 | 48173.5 | 48506.5 |
| Correlated five-factor | 0.05 (0.05 - 0.06) | 0.91 | 0.90 | 0.07 | 734.07 | 242 | 44711.4 | 45090.6 |
| Second order hierarchical | 0.06 (0.05 – 0.06) | 0.90 | 0.89 | 0.08 | 832.00 | 247 | 44811.0 | 45167.1 |
| CFA at post-treatment | | | | |  |  |  |  |
| One-factor | 0.13 (0.13 – 0.14) | 0.46 | 0.41 | 0.12 | 2385.42 | 252 | 29386.8 | 29690.2 |
| Correlated five-factor | 0.05 (0.04 – 0.05) | 0.94 | 0.93 | 0.05 | 497.74 | 242 | 27219.0 | 27564.6 |
| Second order hierarchical | 0.05 (0.04 – 0.05) | 0.93 | 0.92 | 0.06 | 528.75 | 247 | 27243.3 | 27567.9 |
| *Note.* RMSEA = Root Mean Square Error of Approximation, CFI = Comparative Fit Index, TLI = Tucker-Lewis Index, SRMR = Standardized Root Mean Squared Residual, df = degrees of freedom, AIC = Akaike Information Criterion, BIC = Bayesian Information Criterion | | | | | | | | |

**Supplementary Table S2**

*Standardized factor loadings for the correlated five-factor CFA models pre- and post-MBCT*

| Item | Obs | | Des | | Awa | | Njud | | Nrec | |
| --- | --- | --- | --- | --- | --- | --- | --- | --- | --- | --- |
|  | Pre | Post | Pre | Post | Pre | Post | Pre | Post | Pre | Post |
| 1. *I’m good at finding words to describe my feelings* |  |  | 0.85 | 0.85 |  |  |  |  |  |  |
| 2. *I can easily put my beliefs, opinions, and expectations into words* |  |  | 0.79 | 0.79 |  |  |  |  |  |  |
| 3. *I watch my feelings without getting carried away by them* |  |  |  |  |  |  |  |  | 0.59 | 0.64 |
| 4. *I tell myself I shouldn’t be feeling the way I’m feeling* |  |  |  |  |  |  | 0.69 | 0.64 |  |  |
| 5. *It’s hard for me to find the words to describe what I’m thinking* |  |  | 0.81 | 0.78 |  |  |  |  |  |  |
| 6. *I pay attention to physical experiences, such as the wind in my hair or sun on my face* | 0.78 | 0.74 |  |  |  |  |  |  |  |  |
| 7. *I make judgments about whether my thoughts are good or bad* |  |  |  |  |  |  | 0.63 | 0.66 |  |  |
| 8. *I find it difficult to stay focused on what’s happening in the present moment* |  |  |  |  | 0.53 | 0.54 |  |  |  |  |
| 9. *When I have distressing thoughts or images, I don’t let myself be carried away by them* |  |  |  |  |  |  |  |  | 0.63 | 0.64 |
| 10. *Generally, I pay attention to sounds, such as clocks ticking, birds chirping, or cars passing* | 0.57 | 0.56 |  |  |  |  |  |  |  |  |
| 11. *When I feel something in my body, it’s hard for me to find the right words to describe it* |  |  | 0.61 | 0.56 |  |  |  |  |  |  |
| 12. *It seems I am “running on automatic” without much awareness of what I’m doing* |  |  |  |  | 0.66 | 0.68 |  |  |  |  |
| 13. *When I have distressing thoughts or images, I feel calm soon after* |  |  |  |  |  |  |  |  | 0.69 | 0.69 |
| 14. *I tell myself that I shouldn’t be thinking the way I’m thinking* |  |  |  |  |  |  | 0.72 | 0.70 |  |  |
| 15. *I notice the smells and aromas of things* | 0.66 | 0.71 |  |  |  |  |  |  |  |  |
| 16. *Even when I’m feeling terribly upset, I can find a way to put it into words* |  |  | 0.76 | 0.73 |  |  |  |  |  |  |
| 17. *I rush through activities without being really attentive to them* |  |  |  |  | 0.72 | 0.74 |  |  |  |  |
| 18. *Usually when I have distressing thoughts or images I can just notice them without reacting* |  |  |  |  |  |  |  |  | 0.47 | 0.67 |
| 19. *I think some of my emotions are bad or inappropriate and I shouldn’t feel them* |  |  |  |  |  |  | 0.58 | 0.71 |  |  |
| 20. *I notice visual elements in art or nature, such as colors, shapes, textures, or patterns of light and shadow* | 0.73 | 0.80 |  |  |  |  |  |  |  |  |
| 21. *When I have distressing thoughts or images, I just notice them and let them go* |  |  |  |  |  |  |  |  | 0.79 | 0.73 |
| 22. *I do jobs or tasks automatically without being aware of what I’m doing* |  |  |  |  | 0.82 | 0.80 |  |  |  |  |
| 23. *I find myself doing things without paying attention* |  |  |  |  | 0.84 | 0.79 |  |  |  |  |
| 24. *I disapprove of myself when I have illogical ideas* |  |  |  |  |  |  | 0.65 | 0.71 |  |  |
|  |  |  |  |  |  |  |  |  |  |  |
| *Note.* Obs = observing, Des = describing, Awa = acting with awareness, Njud = Non-judgment of inner experience, Nrec = Non-reactivity to inner experience, pre = before MBCT, post = after MBCT | | | | | | | | | | |

**Supplementary Table S3**

*Profile sizes based on estimated model and posterior classification probabilities for 1 through 8 latent profiles*

| Number of profiles | *n* per profile based on estimated model | Average latent class probabilities for most likely latent class membership |
| --- | --- | --- |
| 2 | P1 = 437.7; P2 = 316.3 | P1 = 0.88; P2 = 0.85 |
| 3 | P1 = 211.2; P2 = 437.5; P3 = 105.3 | P1 = 0.81; P2 = 0.82; P3 = 0.79 |
| 4 | P1 = 100.4; P2 = 184.1; P3 = 365.6; P4 = 103.9 | P1 = 0.71; P2 = 0.80; P3 = 0.80; P4 = 0.79 |
| 5 | P1 = 89.2; P2 = 203.7; P3 = 116.8; P4 = 272.1; P5 = 72.3 | P1 = 0.74; P2 = 0.69; P3 = 0.68; P4 = 0.73; P5 = 0.84 |
| 6 | P1 = 100.9; P2 = 250.8; P3 = 203.1; P4 = 76.7; P5 = 72.8; P6 = 49.7 | P1 = 0.78; P2 = 0.71; P3 = 0.67; P4 = 0.65; P5 = 0.68; P6 = 0.82 |
| 7 | P1 = 95.0; P2 = 38.8; P3 = 14.0; P4 = 245.4; P5 = 100.8; P6 = 49.0; P7 = 211.0 | P1 = 0.68; P2 = 0.74; P3 = 0.84; P4 = 0.73; P5 = 0.73; P6 = 0.83; P7 = 0.70 |
| 8 | P1 = 74.4; P2 = 64.8; P3 = 171.3; P4 = 77.6; P5 = 32.5; P6 = 257.8; P7 = 47.0; P8 = 28.5 | P1 = 0.71; P2 = 0.69; P3 = 0.70; P4 = 0.70; P5 = 0.72; P6 = 0.69; P7 = 0.83; P8 = 0.75 |

*Note.* Profile size is based on the estimated model. This means that by means of maximum likelihood estimation the model estimates the probability for each participant of belonging to each of the 4 profiles (4 probabilities that together sum to 1). For each of the 4 profiles, those probabilities of all participants (*n* = 754) are added up, resulting in the profile sizes based on the estimated model. That is why the *n* per profile is not a round number.

**Supplementary Table S4**

*Chi-square test statistics for pairwise comparison of profiles on baseline measures of mental health*

| Measures of mental health (unstandardized scores) | Latent profile comparison | Chi-square test statistic, *p*-value |
| --- | --- | --- |
| Depressive symptoms (BDI-II) | NJA vs VLM | 54.24, *p* < 0.001 |
| NJA vs JO | 1.81, *p* = 0.18 |
| NJA vs HM | 11.02, *p* = 0.001 |
| VLM vs JO | 68.84, *p* < 0.001 |
| VLM vs HM | 155.52, *p* < 0.001 |
| JO vs HM | 33.84, *p* < 0.001 |
| Overall functional impairment (OQ-45) | NJA vs VLM | 36.32, *p* < 0.001 |
| NJA vs JO | 1.07, *p* = 0.30 |
| NJA vs HM | 19.66, *p* < 0.001 |
| VLM vs JO | 45.77, *p* < 0.001 |
| VLM vs HM | 144.03, *p* < 0.001 |
| JO vs HM | 44.25, *p* < 0.001 |
| Worry (PSWQ) | NJA vs VLM | 52.36, *p* < 0.001 |
| NJA vs JO | 10.26, *p* = 0.001 |
| NJA vs HM | 37.26, *p* < 0.001 |
| VLM vs JO | 41.37, *p* < 0.001 |
| VLM vs HM | 258.37, *p* < 0.001 |
| JO vs HM | 133.59, *p* < 0.001 |
| Self-Compassion total score | NJA vs VLM | 58.07, *p* < 0.001 |
| NJA vs JO | 2.98, *p* = 0.08 |
| NJA vs HM | 44.02, *p* < 0.001 |
| VLM vs JO | 77.82, *p* < 0.001 |
| VLM vs HM | 287.97, *p* < 0.001 |
| JO vs HM | 112.29, *p* < 0.001 |
| Self-Kindness | NJA vs VLM | 34.93, *p* < 0.001 |
| NJA vs JO | 0.09, *p* = 0.77 |
| NJA vs HM | 35.26, *p* < 0.001 |
| VLM vs JO | 60.90, *p* < 0.001 |
| VLM vs HM | 194.20, *p* < 0.001 |
| JO vs HM | 61.52, *p* < 0.001 |
| Self-Judgment | NJA vs VLM | 75.04, *p* < 0.001 |
| NJA vs JO | 23.10, *p* < 0.001 |
| NJA vs HM | 11.73, *p* = 0.001 |
| VLM vs JO | 37.66, *p* < 0.001 |
| VLM vs HM | 227.52, *p* < 0.001 |
| JO vs HM | 107.33, *p* < 0.001 |
| Common Humanity | NJA vs VLM | 2.03, *p* = 0.15 |
| NJA vs JO | 9.16, *p* = 0.002 |
| NJA vs HM | 23.28, *p* < 0.001 |
| VLM vs JO | 36.27, *p* < 0.001 |
| VLM vs HM | 62.78, *p* < 0.001 |
| JO vs HM | 8.98, *p* = 0.003 |
| Isolation | NJA vs VLM | 38.30, *p* < 0.001 |
| NJA vs JO | 8.78, *p* = 0.003 |
| NJA vs HM | 15.17, *p* < 0.001 |
| VLM vs JO | 27.38, *p* < 0.001 |
| VLM vs HM | 147.77, *p* < 0.001 |
| JO vs HM | 68.38, *p* < 0.001 |
| Mindfulness | NJA vs VLM | 18.65, *p* < 0.001 |
| NJA vs JO | 5.27, *p* = 0.02 |
| NJA vs HM | 40.84, *p* < 0.001 |
| VLM vs JO | 84.19, *p* < 0.001 |
| VLM vs HM | 167.85, *p* < 0.001 |
| JO vs HM | 31.87, *p* < 0.001 |
| Overidentification | NJA vs VLM | 32.24, *p* < 0.001 |
| NJA vs JO | 10.74, *p* = 0.001 |
| NJA vs HM | 18.75, *p* < 0.001 |
| VLM vs JO | 14.81, *p* < 0.001 |
| VLM vs HM | 138.31, *p* < 0.001 |
| JO vs HM | 80.39, *p* < 0.001 |
|  | | |
| *Note.* NJA = non-judgmentally aware, VLM = very low mindfulness, JO = judgmentally observing, HM = high mindfulness, BDI-II = Becks Depression Inventory second edition, OQ-45 = Outcome Questionnaire 45, PSWQ = Penn State Worry Questionnaire | | |

**Supplementary Table S5**

*Chi-square test statistics for pairwise comparison of profiles on post-treatment measures of mental health*

| Measures of mental health (unstandardized scores) | Latent profile comparison | Chi-square test statistic, *p*-value |
| --- | --- | --- |
| Depressive symptoms (BDI-II) | NJA vs VLM | 6.18, *p* = 0.01 |
| NJA vs JO | 1.37, *p*  = 0.24 |
| NJA vs HM | 0.63, *p*  = 0.43 |
| VLM vs JO | 4.57, *p*  = 0.03 |
| VLM vs HM | 19.18, *p*  < 0.001 |
| JO vs HM | 7.10, *p*  = 0.008 |
| Overall functional impairment (OQ-45) | NJA vs VLM | 1.94, *p*  = 0.16 |
| NJA vs JO | 0.18, *p*  = 0.67 |
| NJA vs HM | 8.19, *p*  = 0.004 |
| VLM vs JO | 1.97, *p*  = 0.16 |
| VLM vs HM | 25.00, *p*  < 0.001 |
| JO vs HM | 16.55, *p* < 0.001 |
| Worry (PSWQ) | NJA vs VLM | 9.47, *p*  = 0.002 |
| NJA vs JO | 6.65, *p*  = 0.01 |
| NJA vs HM | 10.65, *p*  = 0.001 |
| VLM vs JO | 1.05, *p*  = 0.31 |
| VLM vs HM | 48.61, *p*  < 0.001 |
| JO vs HM | 39.52, , *p*  < 0.001 |
| Self-Compassion total score | NJA vs VLM | 11.17, *p*  = 0.001 |
| NJA vs JO | 1.82, *p*  = 0.18 |
| NJA vs HM | 9.39, *p*  = 0.002 |
| VLM vs JO | 7.74, *p*  = 0.005 |
| VLM vs HM | 47.16, *p*  < 0.001 |
| JO vs HM | 23.25, *p*  < 0.001 |
| Self-Kindness | NJA vs VLM | 6.03, *p*  = 0.01 |
| NJA vs JO | 0.21, *p*  = 0.65 |
| NJA vs HM | 9.30, *p*  = 0.002 |
| VLM vs JO | 6.17, *p*  = 0.01 |
| VLM vs HM | 32.35, *p*  < 0.001 |
| JO vs HM | 14.61, *p*  < 0.001 |
| Self-Judgment | NJA vs VLM | 13.43, *p*  < 0.001 |
| NJA vs JO | 5.74, *p*  = 0.02 |
| NJA vs HM | 2.60, *p*  = 0.11 |
| VLM vs JO | 4.26, *p*  = 0.04 |
| VLM vs HM | 34.19, *p*  < 0.001 |
| JO vs HM | 18.43, *p*  < 0.001 |
| Common Humanity | NJA vs VLM | 0.48, *p*  = 0.48 |
| NJA vs JO | 1.11, *p*  = 0.29 |
| NJA vs HM | 3.27, *p*  = 0.07 |
| VLM vs JO | 5.55, *p*  = 0.02 |
| VLM vs HM | 9.65, *p*  = 0.002 |
| JO vs HM | 1.51, *p*  = 0.22 |
| Isolation | NJA vs VLM | 9.45, *p*  = 0.002 |
| NJA vs JO | 5.48, *p*  = 0.02 |
| NJA vs HM | 3.37, *p*  = 0.07 |
| VLM vs JO | 1.90, *p*  = 0.17 |
| VLM vs HM | 33.46, *p*  < 0.001 |
| JO vs HM | 22.81, *p*  < 0.001 |
| Mindfulness | NJA vs VLM | 1.91, *p*  = 0.16 |
| NJA vs JO | 2.26, *p*  = 0.13 |
| NJA vs HM | 8.88, *p*  = 0.003 |
| VLM vs JO | 15.63, *p*  < 0.001 |
| VLM vs HM | 27.07, *p*  < 0.001 |
| JO vs HM | 5.41, *p*  = 0.02 |
| Overidentification | NJA vs VLM | 7.81, *p*  = 0.005 |
| NJA vs JO | 4.44, *p*  = 0.04 |
| NJA vs HM | 6.29, *p*  = 0.01 |
| VLM vs JO | 1.49, *p*  = 0.22 |
| VLM vs HM | 39.40, *p*  < 0.001 |
| JO vs HM | 28.20, *p*  < 0.001 |
| *Note.* NJA = non-judgmentally aware, VLM = very low mindfulness, JO = judgmentally observing, HM = high mindfulness, BDI-II = Becks Depression Inventory second edition, OQ-45 = Outcome Questionnaire 45, PSWQ = Penn State Worry Questionnaire | | |

**Supplementary Table S6**

*Chi-square test statistics for pairwise comparison of profiles on the residualized change scores of mental health measures*

| Measures of mental health (residualized change scores) | Latent profile comparison | Chi-square test statistic, *p*-value |
| --- | --- | --- |
| Depressive symptoms (BDI-II) | NJA vs VLM | 0.36, *p* = 0.55 |
| NJA vs JO | 0.29, *p* = 0.59 |
| NJA vs HM | 0.36, *p* = 0.55 |
| VLM vs JO | 2.39, *p* = 0.12 |
| VLM vs HM | 3.23, *p* = 0.07 |
| JO vs HM | 0.02, *p* = 0.89 |
| Overall functional impairment (OQ-45) | NJA vs VLM | 2.35, *p* = 0.13 |
| NJA vs JO | 0.05, *p* = 0.83 |
| NJA vs HM | 1.16, *p* = 0.28 |
| VLM vs JO | 3.03, *p* = 0.08 |
| VLM vs HM | 0.33, *p* = 0.57 |
| JO vs HM | 1.37, *p* = 0.24 |
| Worry (PSWQ) | NJA vs VLM | 1.19, *p* = 0.27 |
| NJA vs JO | 0.23, *p* = 0.63 |
| NJA vs HM | 0.000, *p* = 1.00 |
| VLM vs JO | 4.03, *p* = 0.045 |
| VLM vs HM | 1.62, *p* = 0.20 |
| JO vs HM | 0.24, *p* = 0.62 |
| Self-Compassion total score | NJA vs VLM | 0.33, *p* = 0.57 |
| NJA vs JO | 0.01, *p* = 0.91 |
| NJA vs HM | 0.90, *p* = 0.34 |
| VLM vs JO | 1.06, *p* = 0.30 |
| VLM vs HM | 0.19, *p* = 0.66 |
| JO vs HM | 2.19, *p* = 0.14 |
| Self-Kindness | NJA vs VLM | 0.001, *p* = 0.97 |
| NJA vs JO | 0.013, *p* = 0.91 |
| NJA vs HM | 1.06, *p* = 0.30 |
| VLM vs JO | 0.03, *p* = 0.87 |
| VLM vs HM | 1.35, *p* = 0.25 |
| JO vs HM | 1.84, *p* = 0.18 |
| Self-Judgment | NJA vs VLM | 0.33, *p* = 0.57 |
| NJA vs JO | 0.03, *p* = 0.86 |
| NJA vs HM | 0.95, *p* = 0.33 |
| VLM vs JO | 0.34, *p* = 0.56 |
| VLM vs HM | 0.36, *p* = 0.55 |
| JO vs HM | 1.21, *p* = 0.27 |
| Common Humanity | NJA vs VLM | 0.07, *p* = 0.79 |
| NJA vs JO | 0.02, *p* = 0.90 |
| NJA vs HM | 0.001, *p* = 0.97 |
| VLM vs JO | 0.04, *p* = 0.84 |
| VLM vs HM | 0.14, *p* = 0.71 |
| JO vs HM | 0.04, *p* = 0.85 |
| Isolation | NJA vs VLM | 0.09, *p* = 0.77 |
| NJA vs JO | 2.44, *p* = 0.12 |
| NJA vs HM | 0.45, *p* = 0.50 |
| VLM vs JO | 2.49, *p* = 0.11 |
| VLM vs HM | 1.43, *p* = 0.23 |
| JO vs HM | 5.97, *p* = 0.02 |
| Mindfulness | NJA vs VLM | 0.10, *p* = 0.75 |
| NJA vs JO | 0.84, *p* = 0.36 |
| NJA vs HM | 1.51, *p* = 0.22 |
| VLM vs JO | 0.49, *p* = 0.48 |
| VLM vs HM | 1.49, *p* = 0.22 |
| JO vs HM | 0.39, *p* = 0.53 |
| Overidentification | NJA vs VLM | 0.61, *p* = 0.43 |
| NJA vs JO | 0.09, *p* = 0.76 |
| NJA vs HM | 2.15, *p* = 0.14 |
| VLM vs JO | 2.26, *p* = 0.13 |
| VLM vs HM | 0.96, *p* = 0.33 |
| JO vs HM | 5.10, *p* = 0.02 |
| *Note.* NJA = non-judgmentally aware, VLM = very low mindfulness, JO = judgmentally observing, HM = high mindfulness, BDI-II = Becks Depression Inventory second edition, OQ-45 = Outcome Questionnaire 45, PSWQ = Penn State Worry Questionnaire | | |

**Supplementary Table S7**

*Fit indices for 1 through 8 profiles for cross-sectional latent profile analyses with imputed datasets*

| Number of profiles | *df* | BIC  Mean (SD) | SABIC  Mean (SD) | Entropy |
| --- | --- | --- | --- | --- |
| Baseline |  |  |  |  |
| 2 | 16 | 8412.73 (2.54) | 8361.92 (2.54) | .57 |
| 3 | 22 | 8379.45 (2.86) | 8309.59 (2.86) | .60 |
| 4 | 28 | 8353.56 (3.00) | 8264.64 (3.00) | .62 |
| 5 | 34 | 8369.94 (2.81) | 8261.97 (2.81) | .58 |
| 6 | 40 | 8379.86 (2.64) | 8252.84 (2.64) | .59 |
| 7 | 46 | 8395.87 (2.80) | 8249.80 (2.80) | .64 |
| 8 | 52 | 8421.39 (3.43) | 8256.27 (3.43) | .63 |

**Supplementary Table S8**

*Mean scores on mindfulness facets across the latent profiles from LPAs with imputed data sets*

|  | Profile 1: Non-judgmentally aware (*n* = 100) | Profile 2: Very low mindfulness  (*n* = 184) | Profile 3: Judgmentally observing  (*n* = 364) | Profile 4: High mindfulness  (*n* = 106) |
| --- | --- | --- | --- | --- |
| Mean [CI 95%]  (*SE*, variance) | Mean [CI 95%]  (*SE*, variance) | Mean [CI 95%]  (*SE*, variance) | Mean [CI 95%]  (*SE*, variance) |
| Mindfulness facets (unstandardized scores) | | | | |
| Observing | 2.61 [1.74, 3.47]  (0.44, 0.46) | 2.91 [2.17, 3.65]  0(.38, 0.46) | 3.77 [3.63, 3.89]  (0.07, 0.46) | 3.83 [3.46, 4.20]  (0.19, 0.46) |
| Describing | 3.00 [2.45, 3.55]  (0.28, 0.60) | 2.91 [2.49, 3.34]  (0.22, 0.60) | 3.47 [3.28, 3.67]  (0.10, 0.60) | 3.98 [3.62, 4.33]  (0.18, 0.60) |
| Acting with awareness | 2.80 [1.93, 3.68]  (0.45, 0.33) | 2.12 [1.93, 2.32]  (0.10, 0.33) | 2.93 [2.60, 3.25]  (0.17, 0.33) | 3.50 [3.18, 3.81]  (0.16, 0.33) |
| Non-judging | 3.48 [3.04, 3.91]  (0.22, 0.33) | 2.30 [1.81, 2.78]  (0.25, 0.33) | 2.63 [2.33, 2.92]  (0.15, 0.33) | 3.69 [3.04, 4.34]  (0.33, 0.33) |
| Non-reactivity | 2.53 [1.85, 3.20]  (0.35, 0.28) | 2.05 [1.89, 2.21]  (0.08, 0.28) | 2.52 [2.24, 2.80]  (0.14, 0.28) | 3.30 [3.08, 3.53]  (0.12, 0.28) |
| *Note.* CI = confidence interval | | | | |

**Supplementary Table S9**

*Means of baseline mental health measures across the latent profiles for imputed datasets*

|  | Profile 1: Non-judgmentally aware | Profile 2: Very low mindfulness | Profile 3: Judgmentally observing | Profile 4: High mindfulness | Overall Chi-square test statistics |
| --- | --- | --- | --- | --- | --- |
| Mean (*SE*) | Mean (*SE*) | Mean (*SE*) | Mean (*SE*) | *df* = 3 |
| Measures of mental health (unstandardized scores) | | | | |  |
| Depressive symptoms (BDI-II) | 17.55a (1.43) | 31.32 (1.08) | 19.98a (0.68) | 11.38 (1.22) | 164.41*** |
| Overall functional impairment (OQ-45) | 69.93a (2.86) | 92.66 (2.02) | 74.60a (1.38) | 52.40 (2.65) | 156.74*** |
| Worry (PSWQ) | 54.58 (1.69) | 69.14 (0.92) | 60.77 (0.78) | 39.94 (1.43) | 281.04*** |
| Self-Compassion total score | 20.91a (0.70) | 14.26 (0.43) | 19.45a (0.32) | 27.43 (0.651) | 299.87*** |
| Self-Kindness | 3.27a (0.14) | 2.20 (0.10) | 3.21a (0.07) | 4.49 (0.14) | 199.84*** |
| Self-Judgment# | 3.96 (0.18) | 2.06 (0.11) | 2.95 (0.08) | 4.80 (0.15) | 260.22*** |
| Common Humanity | 2.87a (0.16) | 2.58a (0.10) | 3.40 (0.07) | 3.92 (0.14) | 77.81*** |
| Isolation# | 3.75 (0.19) | 2.31 (0.11) | 3.11 (0.08) | 4.78 (0.18) | 158.85*** |
| Mindfulness | 3.39 (0.14) | 2.61 (0.09) | 3.75 (0.07) | 4.70 (0.14) | 187.40*** |
| Overidentification# | 3.70 (0.17) | 2.52 (0.10) | 3.06 (0.08) | 4.73 (0.16) | 150.89*** |
|  |  |  |  |  |  |
| *Note.* Means sharing a superscript within a row indicates that those profiles do not significantly differ from each other (p > 0.05).  BDI-II = Becks Depression Inventory second edition, OQ-45 = Outcome Questionnaire 45, PSWQ = Penn State Worry Questionnaire.  # Negatively phrased items of the SCS were reverse-scored prior to calculation of the subscales and total score. Thus, for all subscales the following applies: higher scores on the subscale means a ‘higher/better’ ability of self-compassion on the corresponding domain.  *** *p* < .001 | | | | | |

**Supplementary Table S10**

*Means of post-treatment mental health measures across the latent profiles for imputed datasets*

|  | Profile 1: Non-judgmentally aware | Profile 2: Very low mindfulness | Profile 3: Judgmentally observing | Profile 4: High mindfulness | Overall Chi-square test statistics |
| --- | --- | --- | --- | --- | --- |
| Mean (*SE*) | Mean (*SE*) | Mean (*SE*) | Mean (*SE*) | *df* = 3 |
| Measures of mental health (unstandardized scores) | | | | |  |
| Depressive symptoms (BDI-II) | 11.73a,b (1.73) | 19.02 (1.25) | 14.13a (0.70) | 8.98b (1.25) | 35.17*** |
| Overall functional impairment (OQ-45) | 62.55a (3.77) | 74.78 (2.51) | 66.65a (1.67) | 49.20 (2.93) | 47.46*** |
| Worry (PSWQ) | 49.46 (2.22) | 58.94a (1.36) | 55.75a (0.89) | 40.09 (1.83) | 86.80*** |
| Self-Compassion total score | 24.59a (0.90) | 20.34 (0.63) | 23.06a (0.39) | 28.95 (0.71) | 84.82*** |
| Self-Kindness | 4.02a (0.19) | 3.35 (0.13) | 3.90a (0.08) | 4.82 (0.15) | 61.09*** |
| Self-Judgment# | 4.25 (0.22) | 3.18 (0.14) | 3.64 (0.10) | 4.90 (0.18) | 59.53*** |
| Common Humanity | 3.72a,b (0.19) | 3.46a (0.13) | 3.94b (0.08) | 4.33 (0.16) | 18.84*** |
| Isolation# | 4.29 (0.25) | 3.24a (0.14) | 3.54a (0.10) | 4.97 (0.18) | 69.51*** |
| Mindfulness | 4.15a,b (0.18) | 3.74a (0.12) | 4.43b (0.07) | 4.97 (0.15) | 50.41*** |
| Overidentification# | 4.18 (0.21) | 3.36a (0.12) | 3.60a (0.09) | 5.01 (0.18) | 58.25*** |
|  |  |  |  |  |  |
| *Note.* Means sharing a superscript within a row indicates that those profiles do not significantly differ from each other (p > 0.05).  BDI-II = Becks Depression Inventory second edition, OQ-45 = Outcome Questionnaire 45, PSWQ = Penn State Worry Questionnaire.  # Negatively phrased items of the SCS were reverse-scored prior to calculation of the subscales and total score. Thus, for all subscales the following applies: higher scores on the subscale means a ‘higher/better’ ability of self-compassion on the corresponding domain.  *** *p* < .001 | | | | | |

**Supplementary Table S11**

*Means of residualized change scores of mental health measures across the latent profiles for imputed datasets*

|  | Profile 1: Non-judgmentally aware | Profile 2: Very low mindfulness | Profile 3: Judgmentally observing | Profile 4: High mindfulness | Overall Chi-square test statistics |
| --- | --- | --- | --- | --- | --- |
| Mean (*SE*) | Mean (*SE*) | Mean (*SE*) | Mean (*SE*) | *df* = 3 |
| Measures of mental health (unstandardized scores) | | | | |  |
| Depressive symptoms (BDI-II) | -0.64 (1.43) | -1.36 (0.99) | 0.65 (0.55) | 0.77 (0.86) | 3.44 (*p* = 0.33) |
| Overall functional impairment (OQ-45) | 0.76 (2.80) | -3.39 (2.12) | 1.50 (1.24) | 0.05 (2.17) | 3.04 (*p* = 0.39) |
| Worry (PSWQ) | -0.84 (1.71) | -1.72 (1.14) | 1.05 (0.66) | 0.21 (1.35) | 3.86 (*p* = 0.28) |
| Self-Compassion total score | 0.30 (0.74) | 0.11 (0.59) | -0.34 (0.33) | 0.69 (0.57) | 2.09 (*p* = 0.55) |
| Self-Kindness | 0.05 (0.17) | -0.07 (0.12) | -0.04 (0.07) | 0.21 (0.13) | 3.35 (*p* = 0.34) |
| Self-Judgment# | 0.00 (0.19) | -0.01 (0.14) | -0.05 (0.08) | 0.18 (0.14) | 1.66 (*p* = 0.65) |
| Common Humanity | 0.04 (0.16) | -0.07 (0.12) | -0.01 (0.07) | 0.12 (0.13) | 1.37 (*p* = 0.71) |
| Isolation# | 0.22 (0.20) | 0.03 (0.13) | -0.15 (0.08) | 0.27 (0.15) | 7.08 (*p* = 0.07) |
| Mindfulness | -0.08 (0.16) | -0.11 (0.11) | 0.04 (0.06) | 0.14 (0.12) | 3.52 (*p* = 0.32) |
| Overidentification# | 0.07 (0.17) | 0.01 (0.12) | -0.09 (0.07) | 0.23 (0.14) | 3.83 (*p* = 0.28) |
|  |  |  |  |  |  |
| *Note.* Pair-wise comparisons between profiles on the different measures were not reported in this table because all overall Wald Chi-square tests were non-significant (*p* > 0.05).  # Negatively phrased items of the SCS were reverse-scored prior to calculation of the subscales, total score, and prior to calculation of residualized change scores. Thus, (more) negative residualized change scores on the BDI-II, OQ-45 and PSWQ represent improvement on these measures, while for self-compassion a (more) positive residualized change score represent a better outcome.  BDI-II = Becks Depression Inventory second edition, OQ-45 = Outcome Questionnaire 45, PSWQ = Penn State Worry Questionnaire | | | | | |

## Availability of data and Mplus code for latent profile analyses

The main folder of the data collection within the Radboud Data Repository (<https://doi.org/10.34973/n6r0-8547>) contains the data file (.sav and .csv) consisting of all variables used in this study (e.g. demographic and clinical information, individual item scores and composite scores of all self-report questionnaires). The subfolder “Mplus” contains three subfolders. The “LPAs” subfolder contains (i) the different LPA models from 2 (c2) up to 8 (c8) latent profiles for LPAs with standardized scores (e.g. c2vm_zscores.inp/out) or raw FFMQ subscale scores (e.g. c2vm_raw.inp/out), (ii) estimation of means of auxiliary variables (baseline, post-MBCT, and residualized change scores) across the latent profiles, and (iii) sensitivity analyses (LPAs in imputed datasets). The “CFA” subfolder contains the CFA analyses. The “IMPUTATION” subfolder contains the files required for the imputation within Mplus, and its output files. The Mplus input (.inp), output (.out) and data files required for the performed latent profile analyses in Mplus (.dat and .sav) can be found within those subfolders.
